# Supplementary material
Source: Springer Nature journal article supplement (https://www.springermedizin.de/resource/supplementary/12943_2013_1302_MOESM2_ESM.pdf/9553210)
Supplement: MOESM2 [file 9553210]

**A**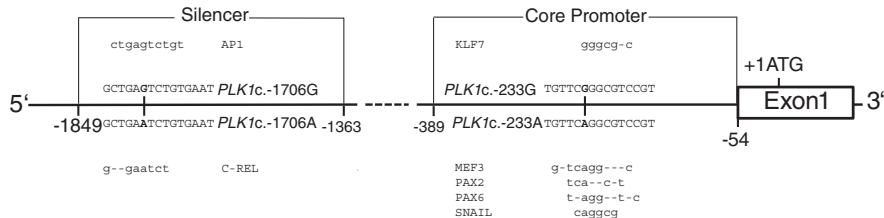**B***PLK1c.-1706G>A*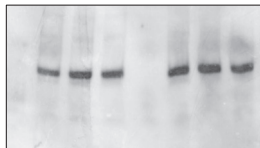

|                  | 1 | 2 | 3 | 4 | 5 | 6 | 7 | 8 |
|------------------|---|---|---|---|---|---|---|---|
| Extract (Hela)   | - | + | + | + | - | + | + | + |
| Competitor       | - | - | + | - | - | - | + | - |
| Cross-Competitor | - | - | - | + | - | - | - | + |
| Alleles          | A | A | A | A | G | G | G | G |

*PLK1c.-233G>A*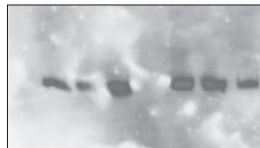

|                  | 1 | 2 | 3 | 4 | 5 | 6 | 7 | 8 |
|------------------|---|---|---|---|---|---|---|---|
| Extract (Hek293) | - | + | + | + | - | + | + | + |
| Competitor       | - | - | + | - | - | - | + | - |
| Cross-Competitor | - | - | - | + | - | - | - | + |
| Alleles          | A | A | A | A | G | G | G | G |
